# Supplementary material
Source: HighWire-hosted journal article supplement (https://bmjopen.bmj.com/content/10/12/e044755)

Site 1

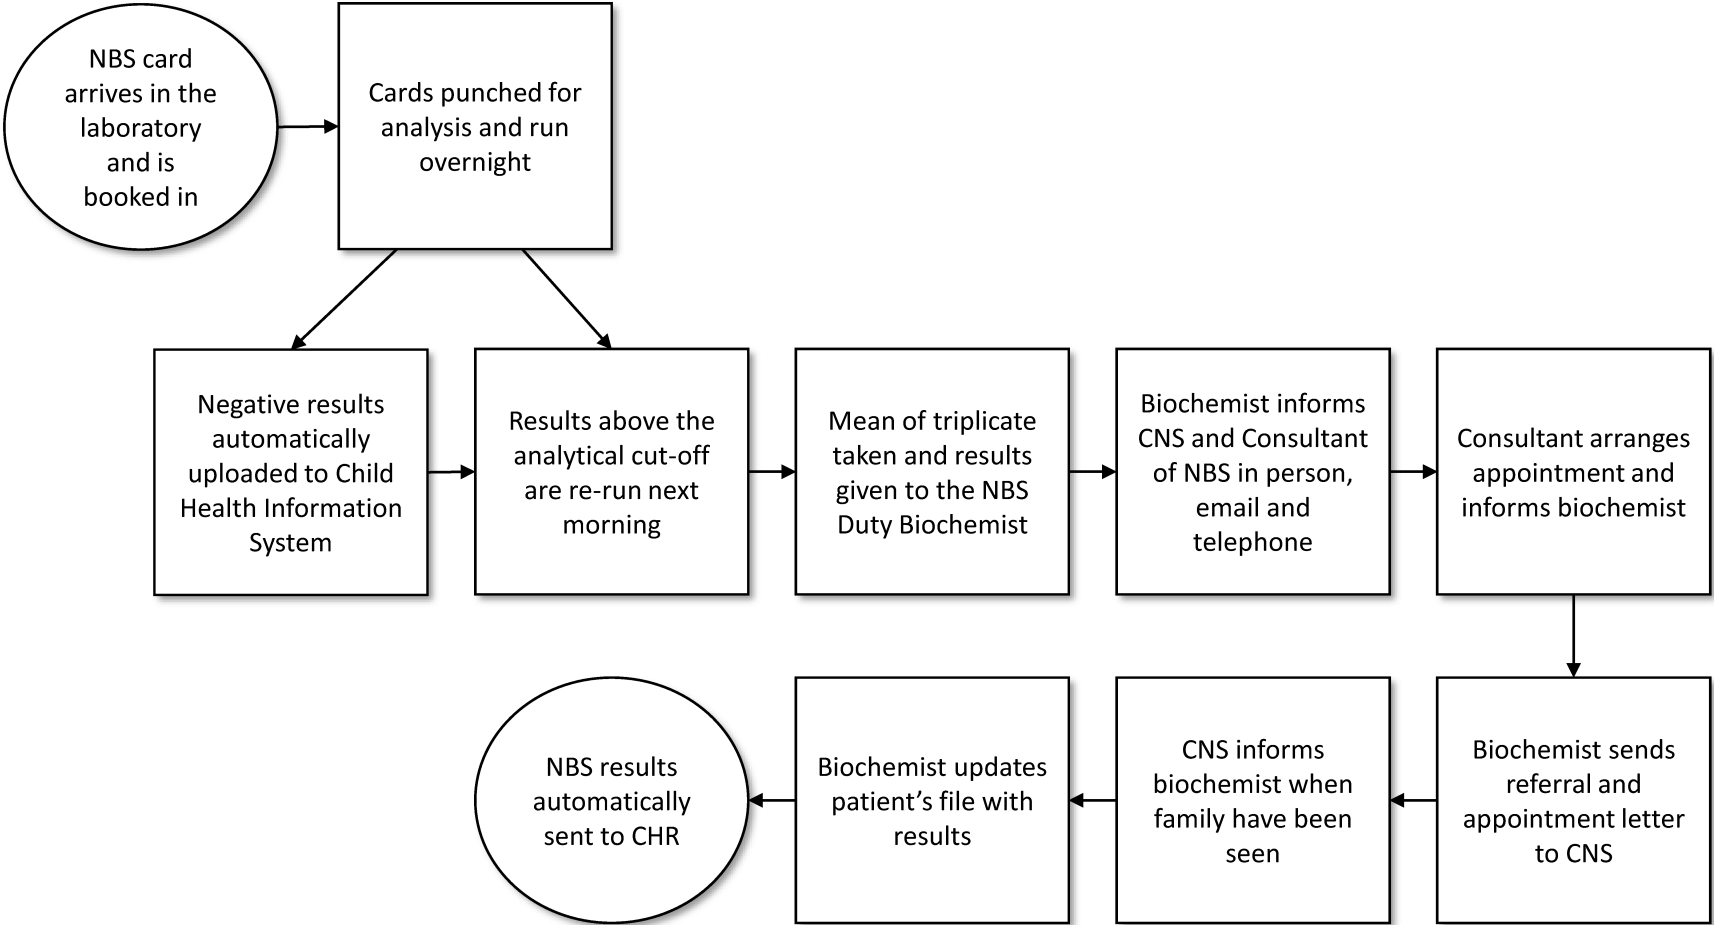

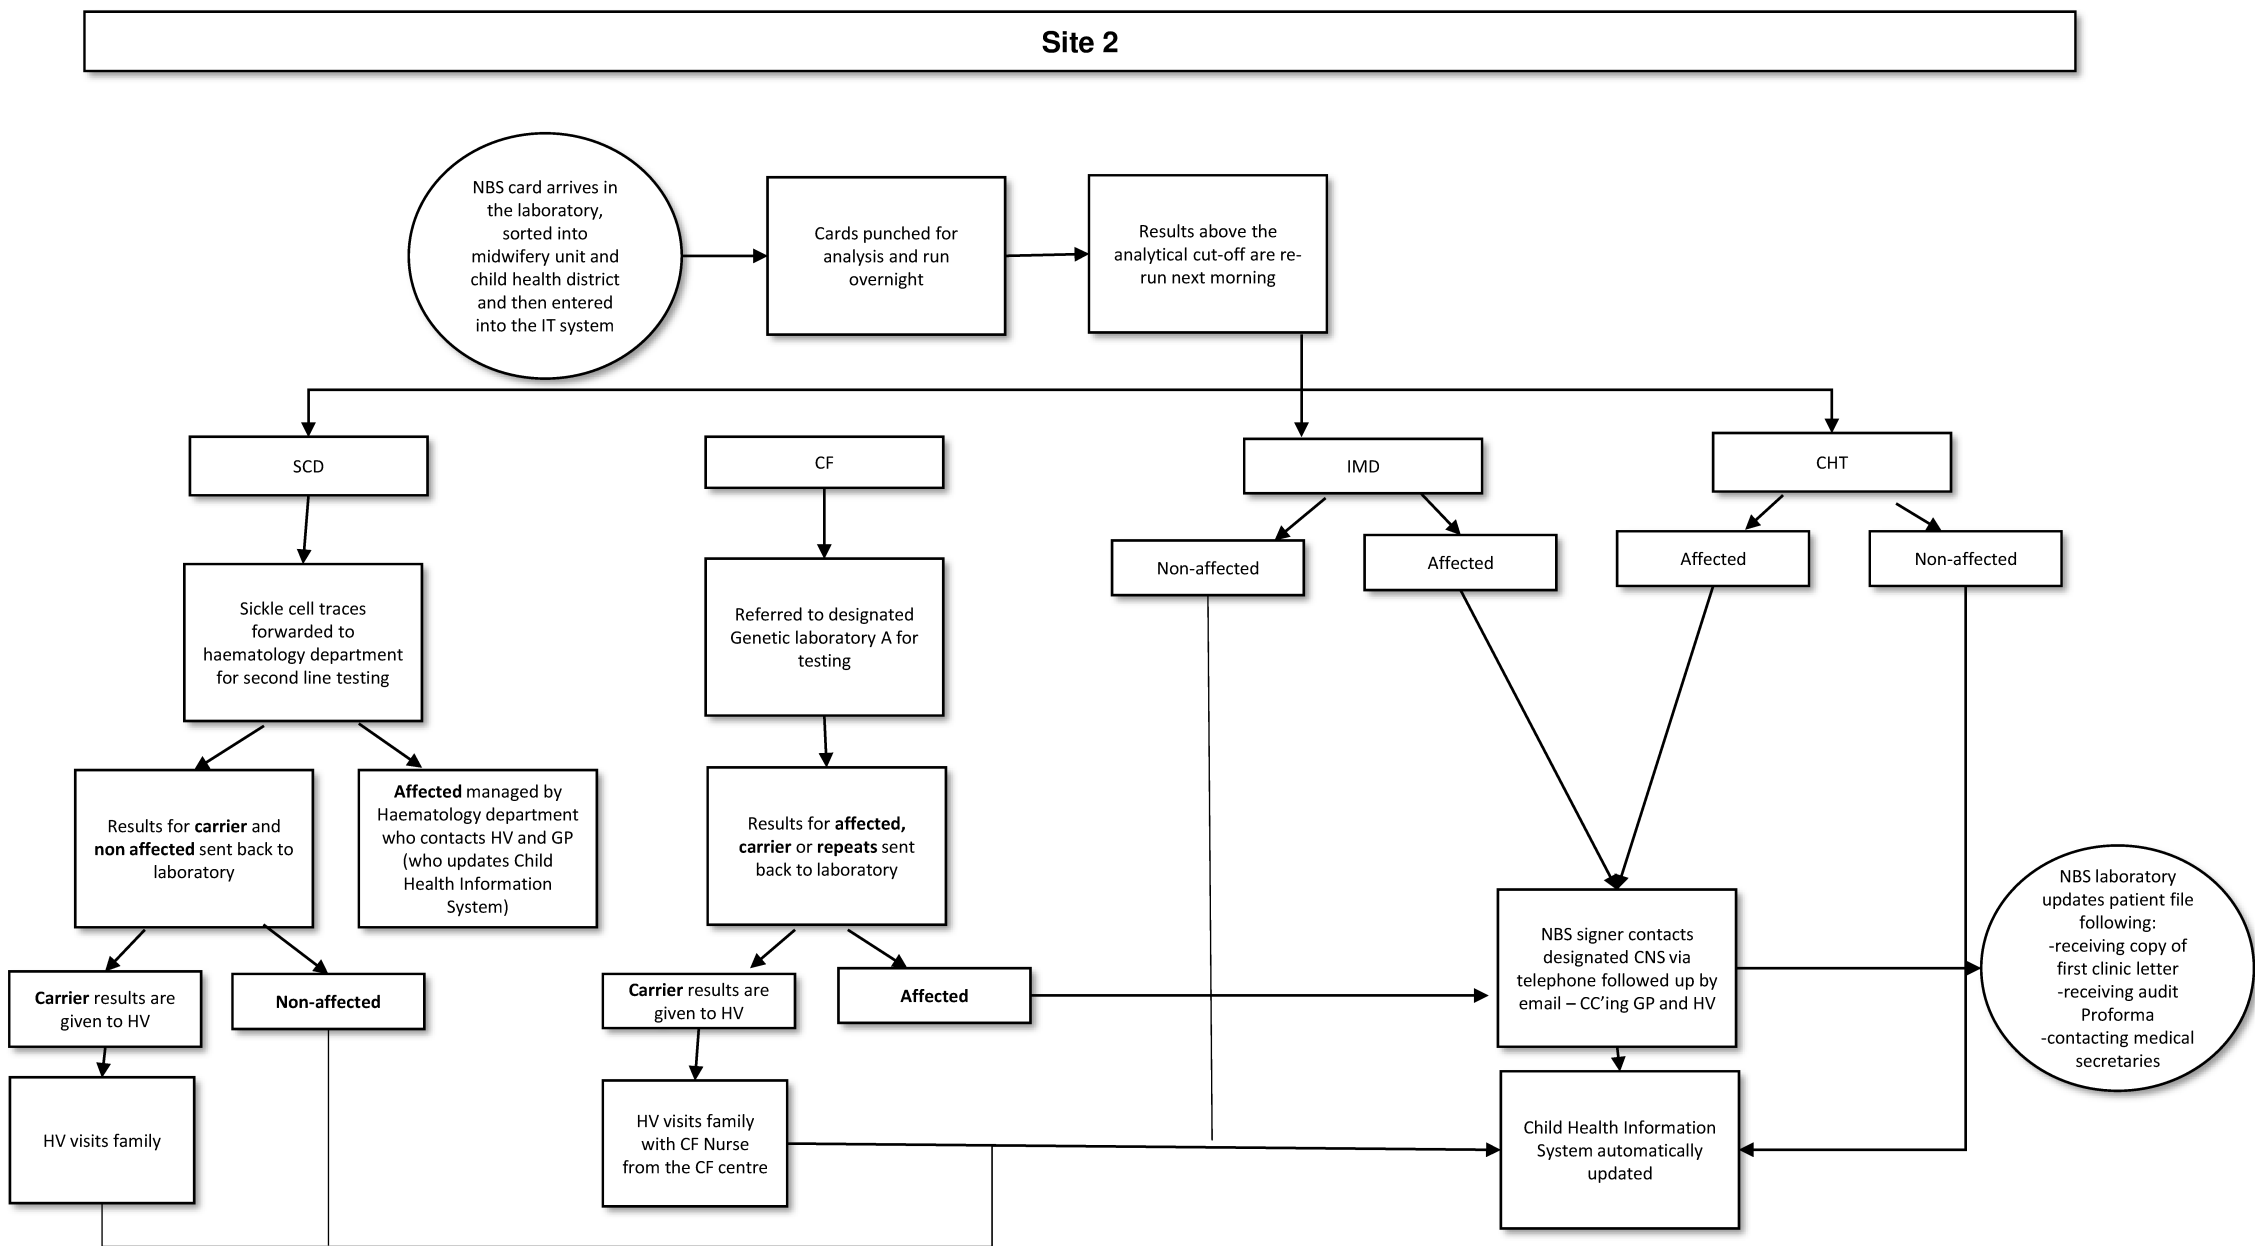

Site 3

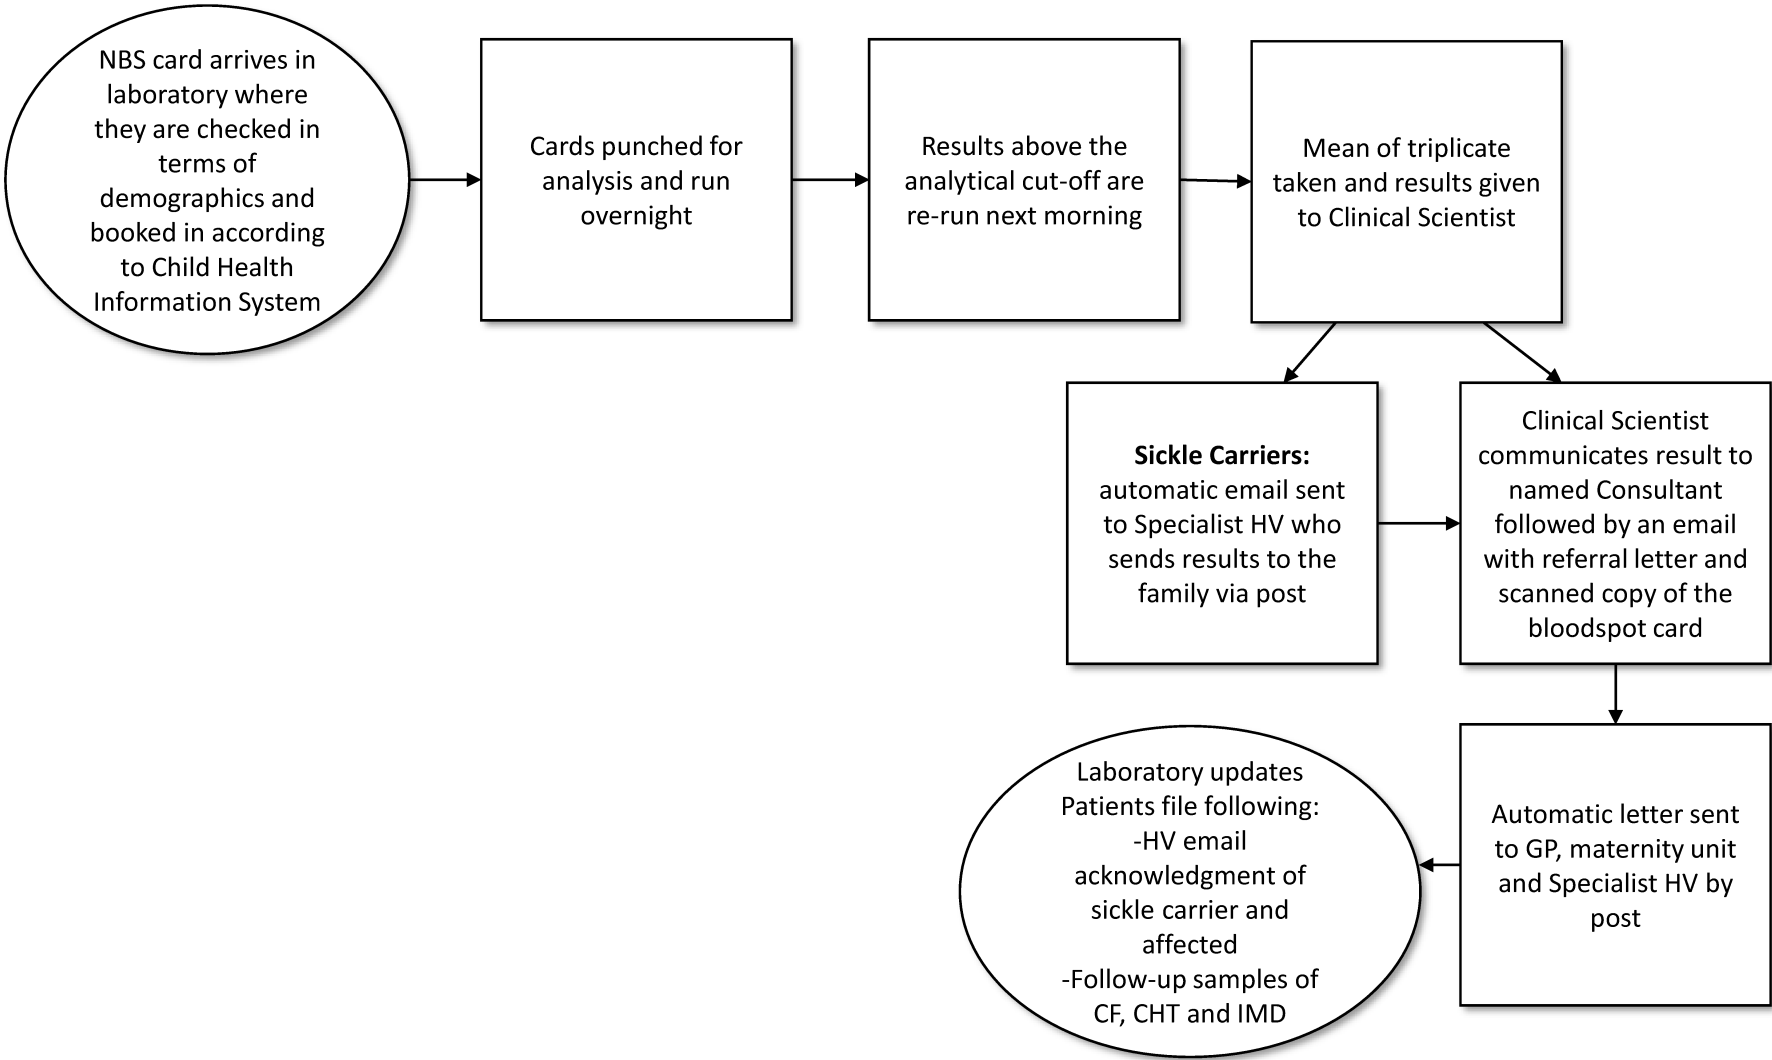

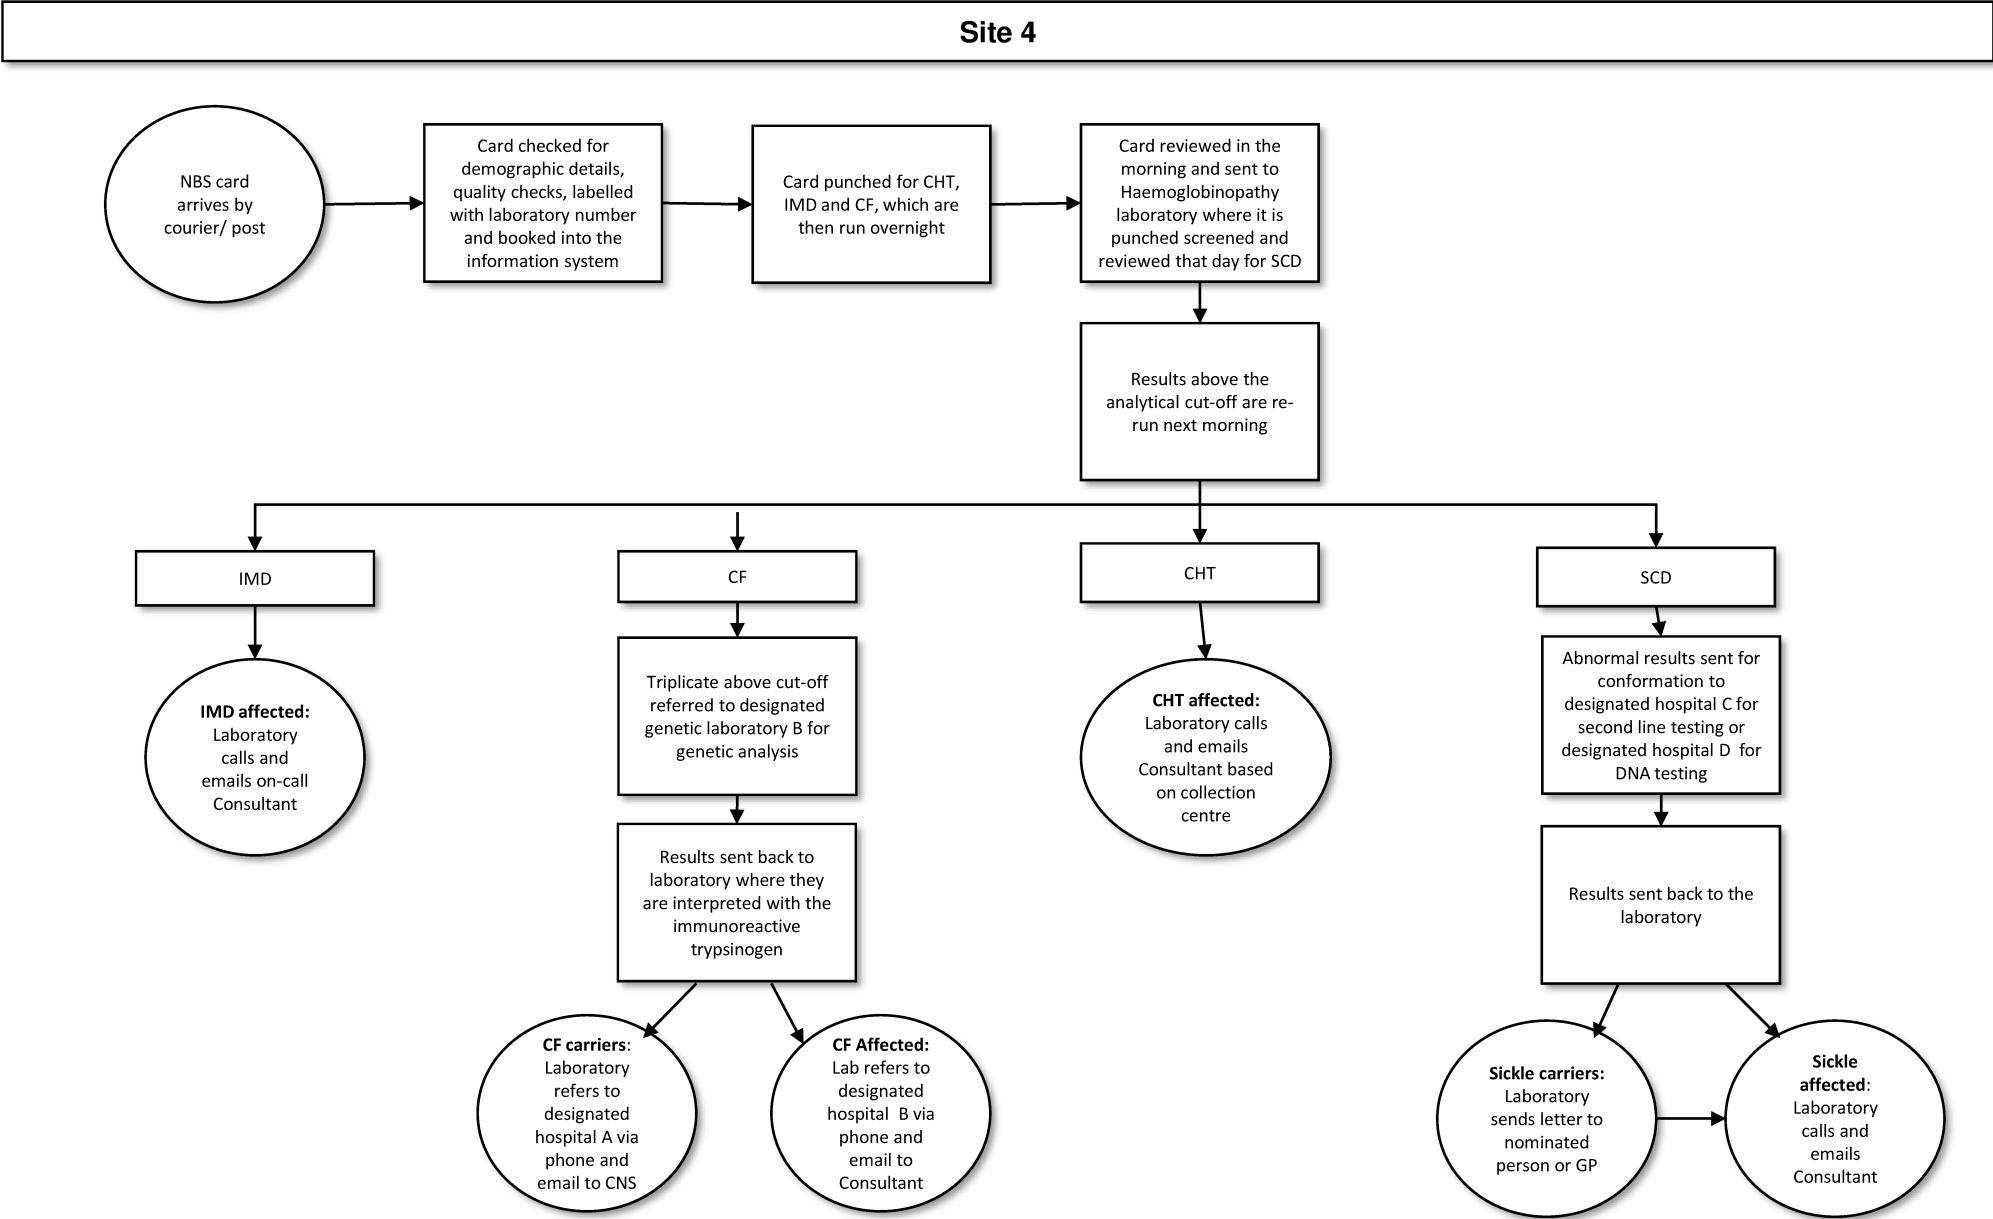

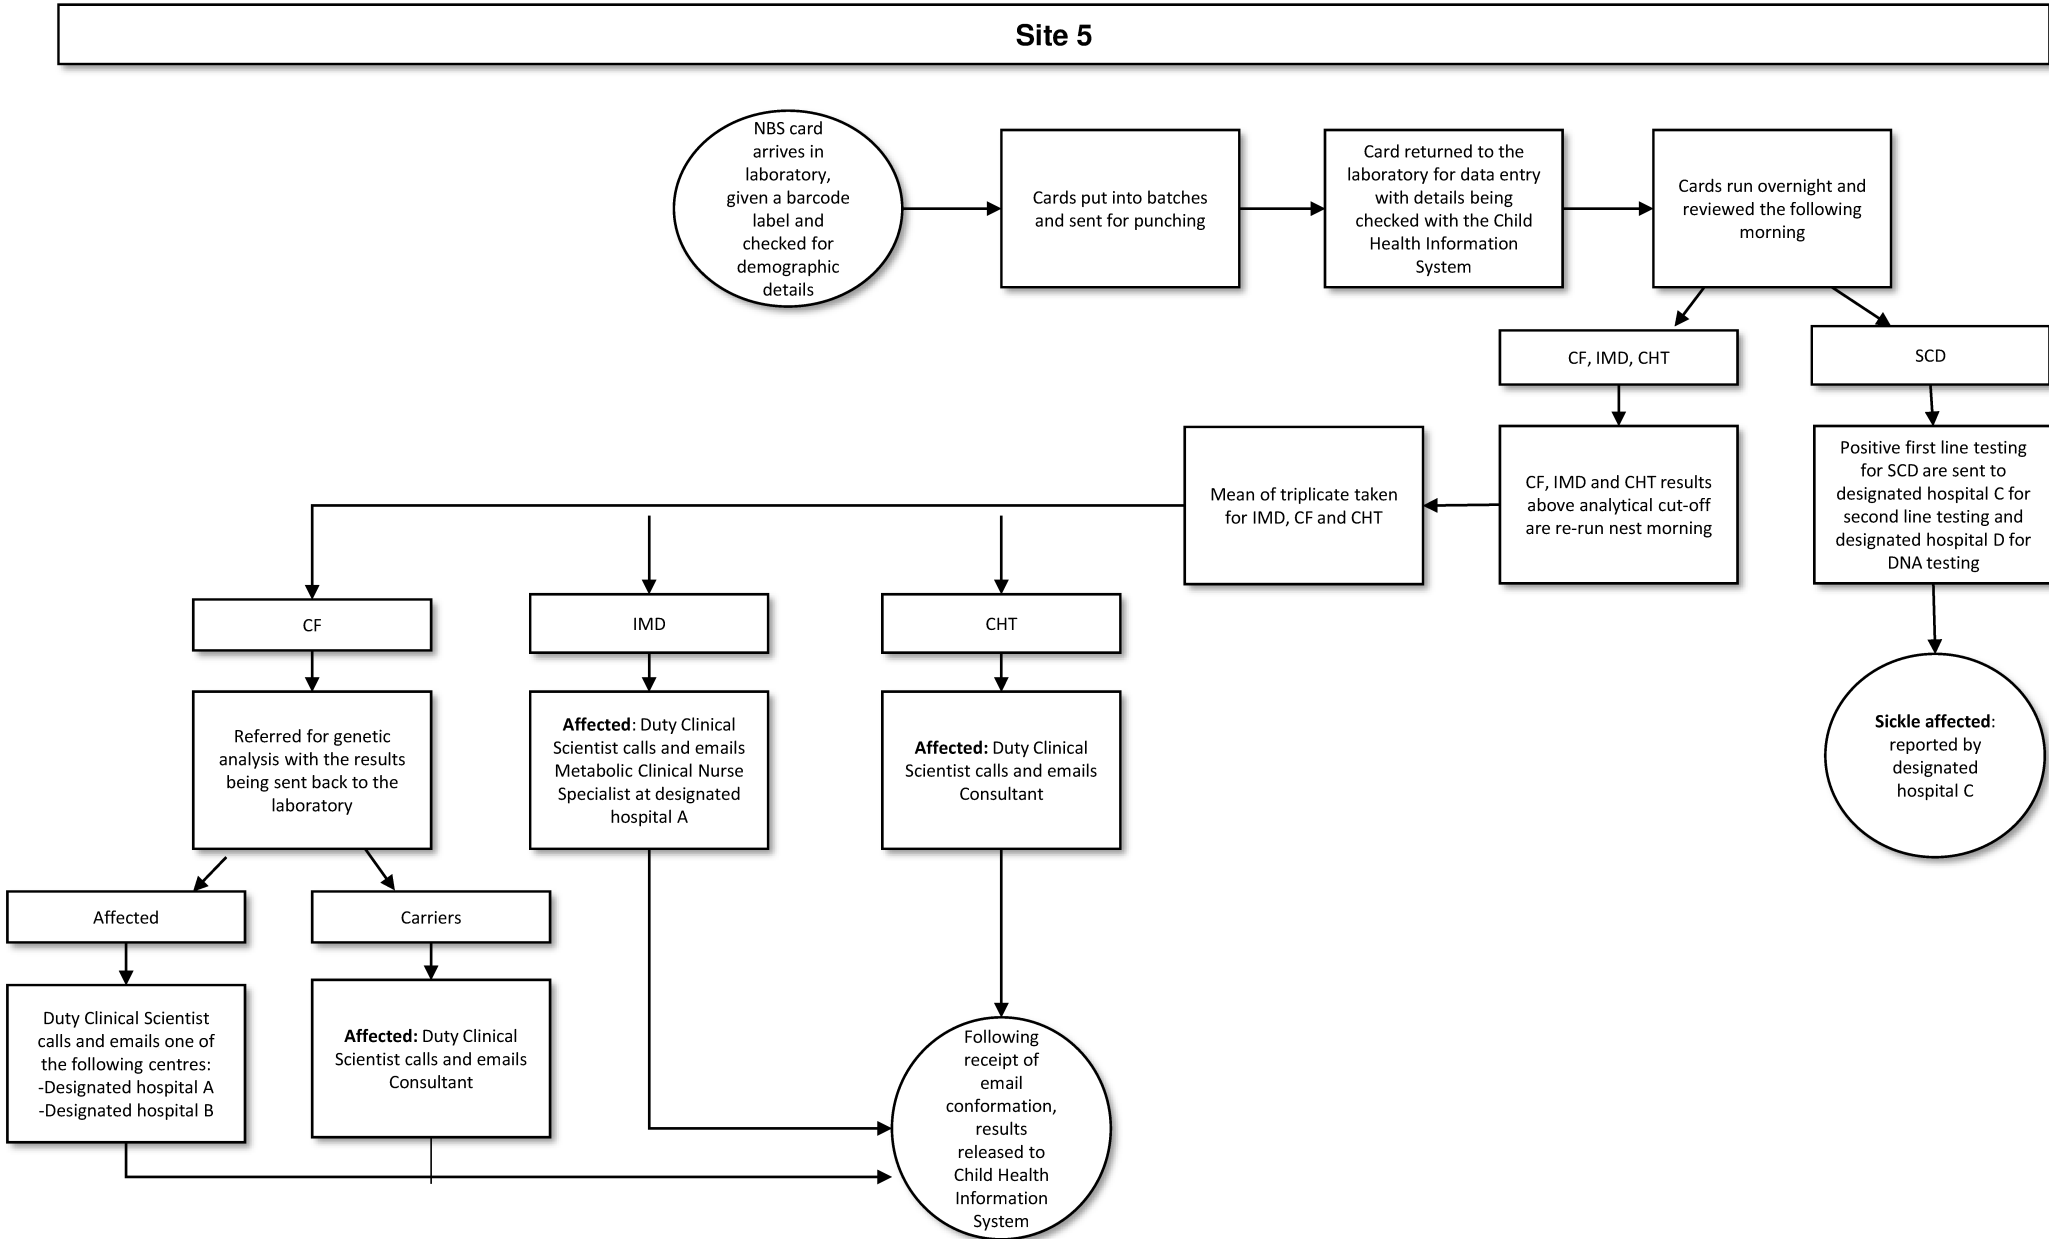

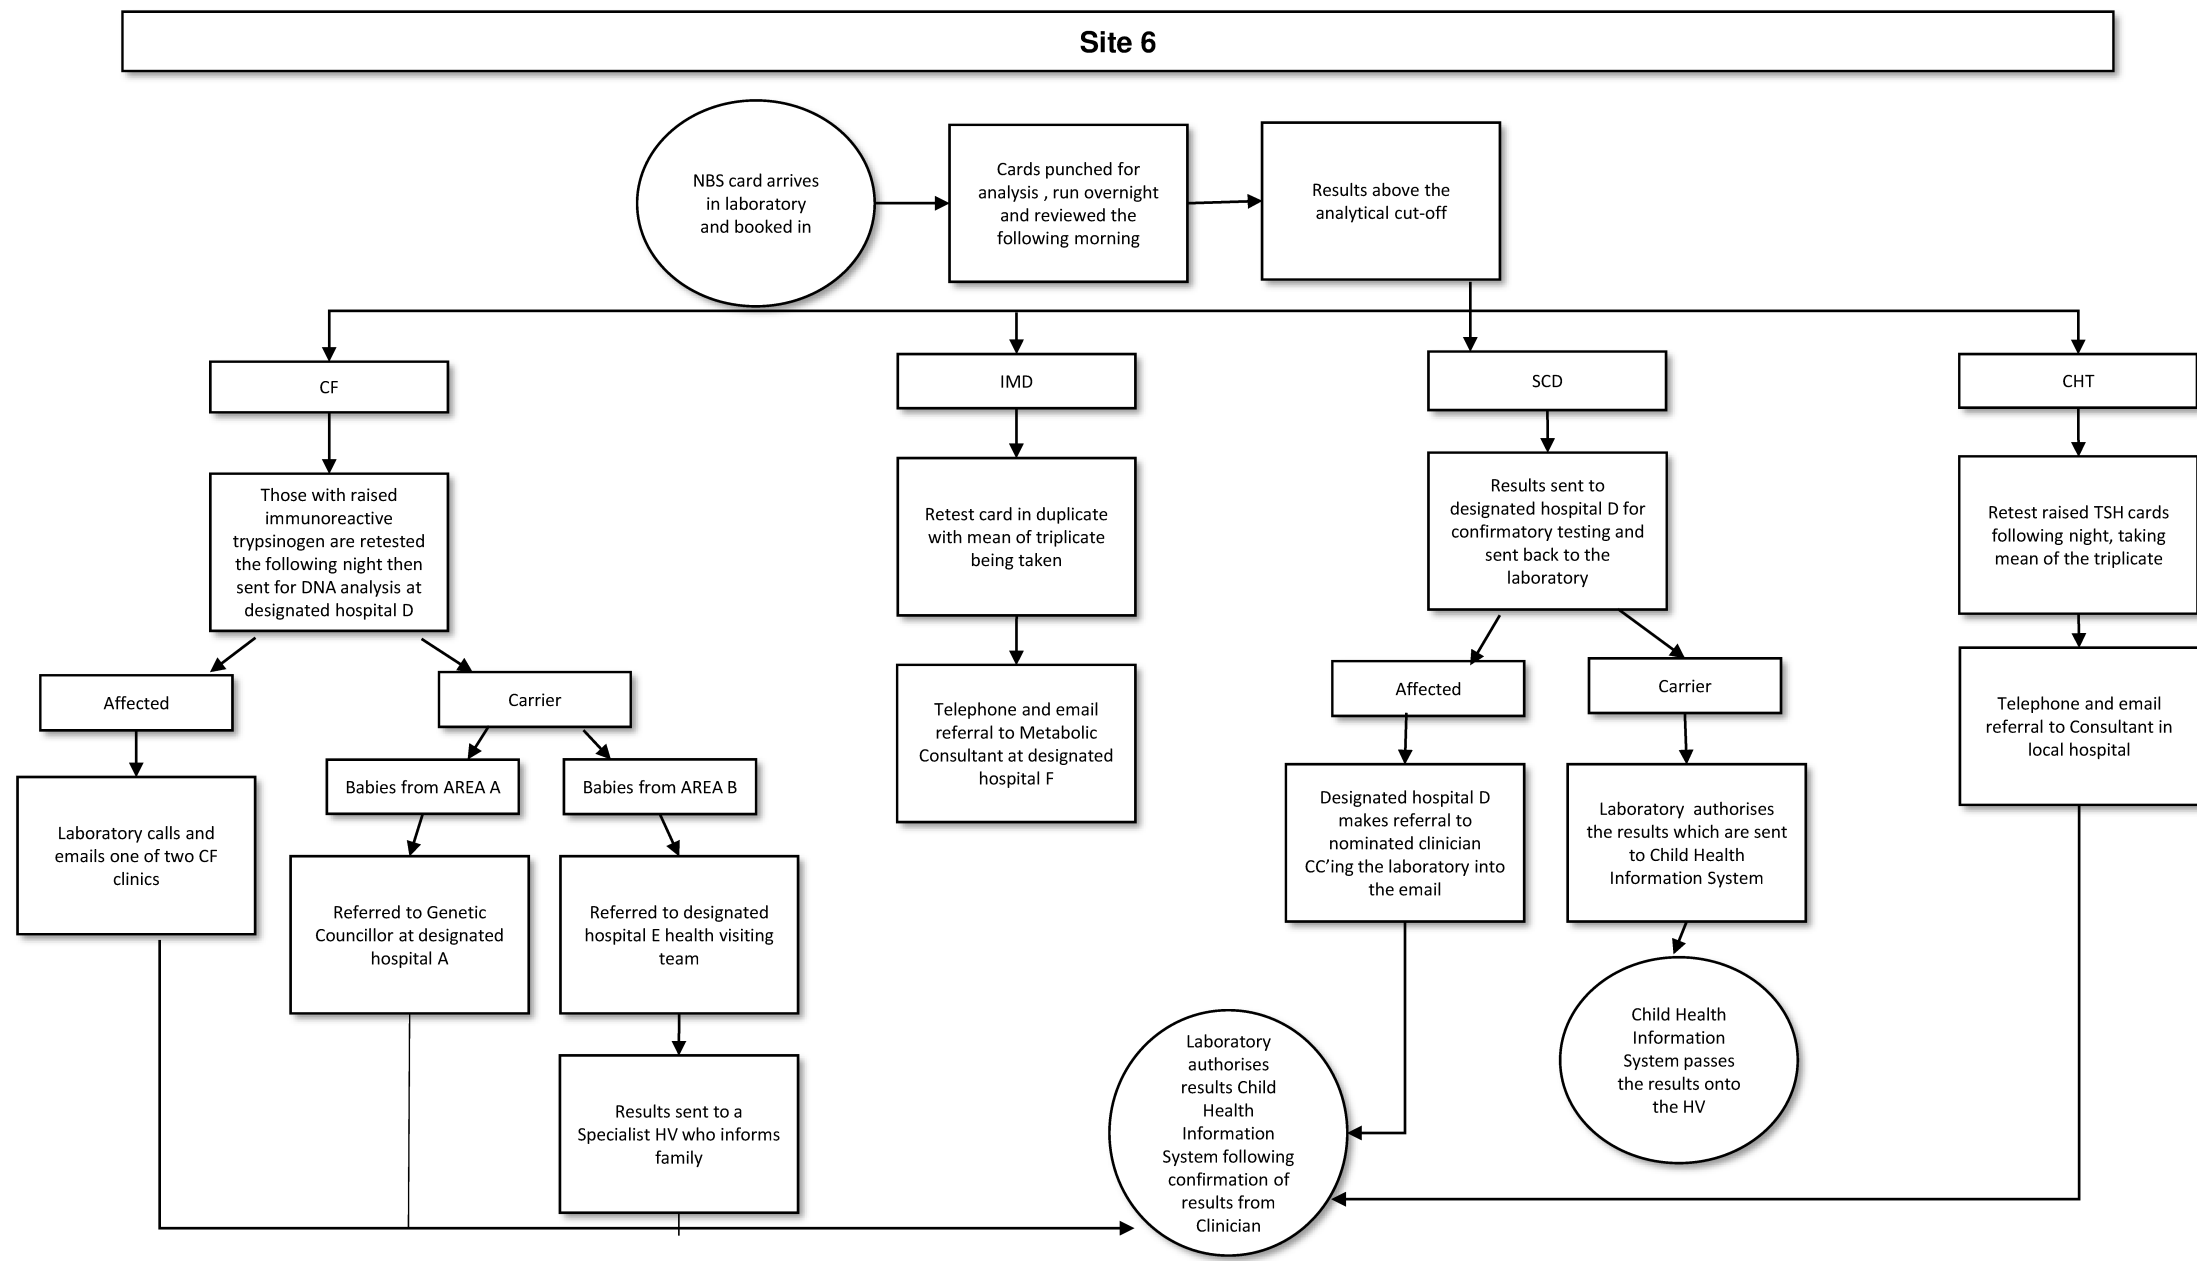

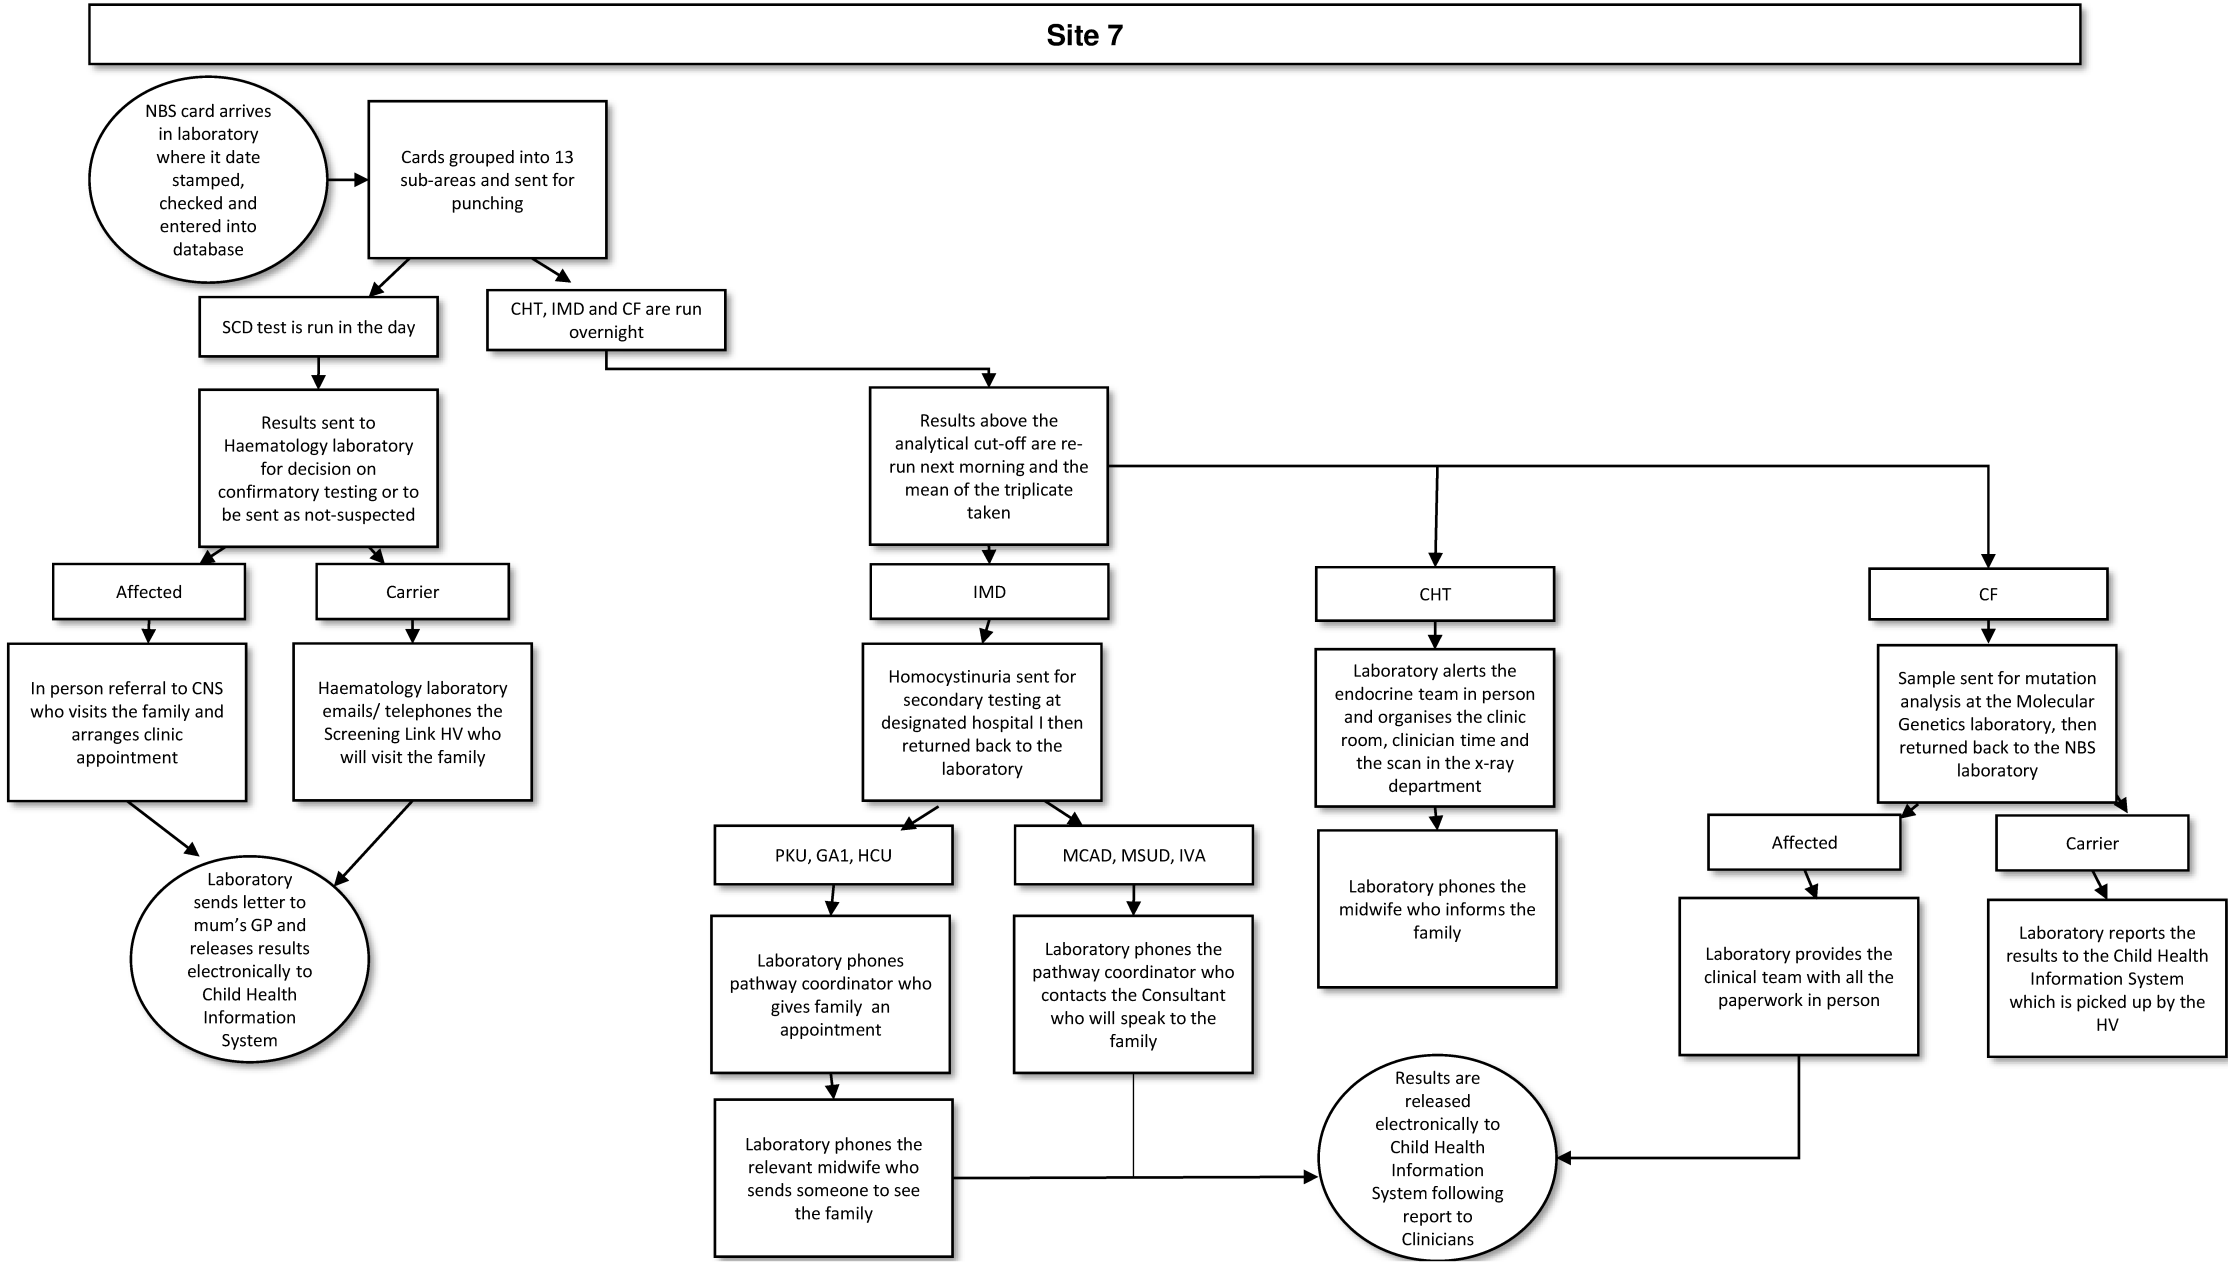

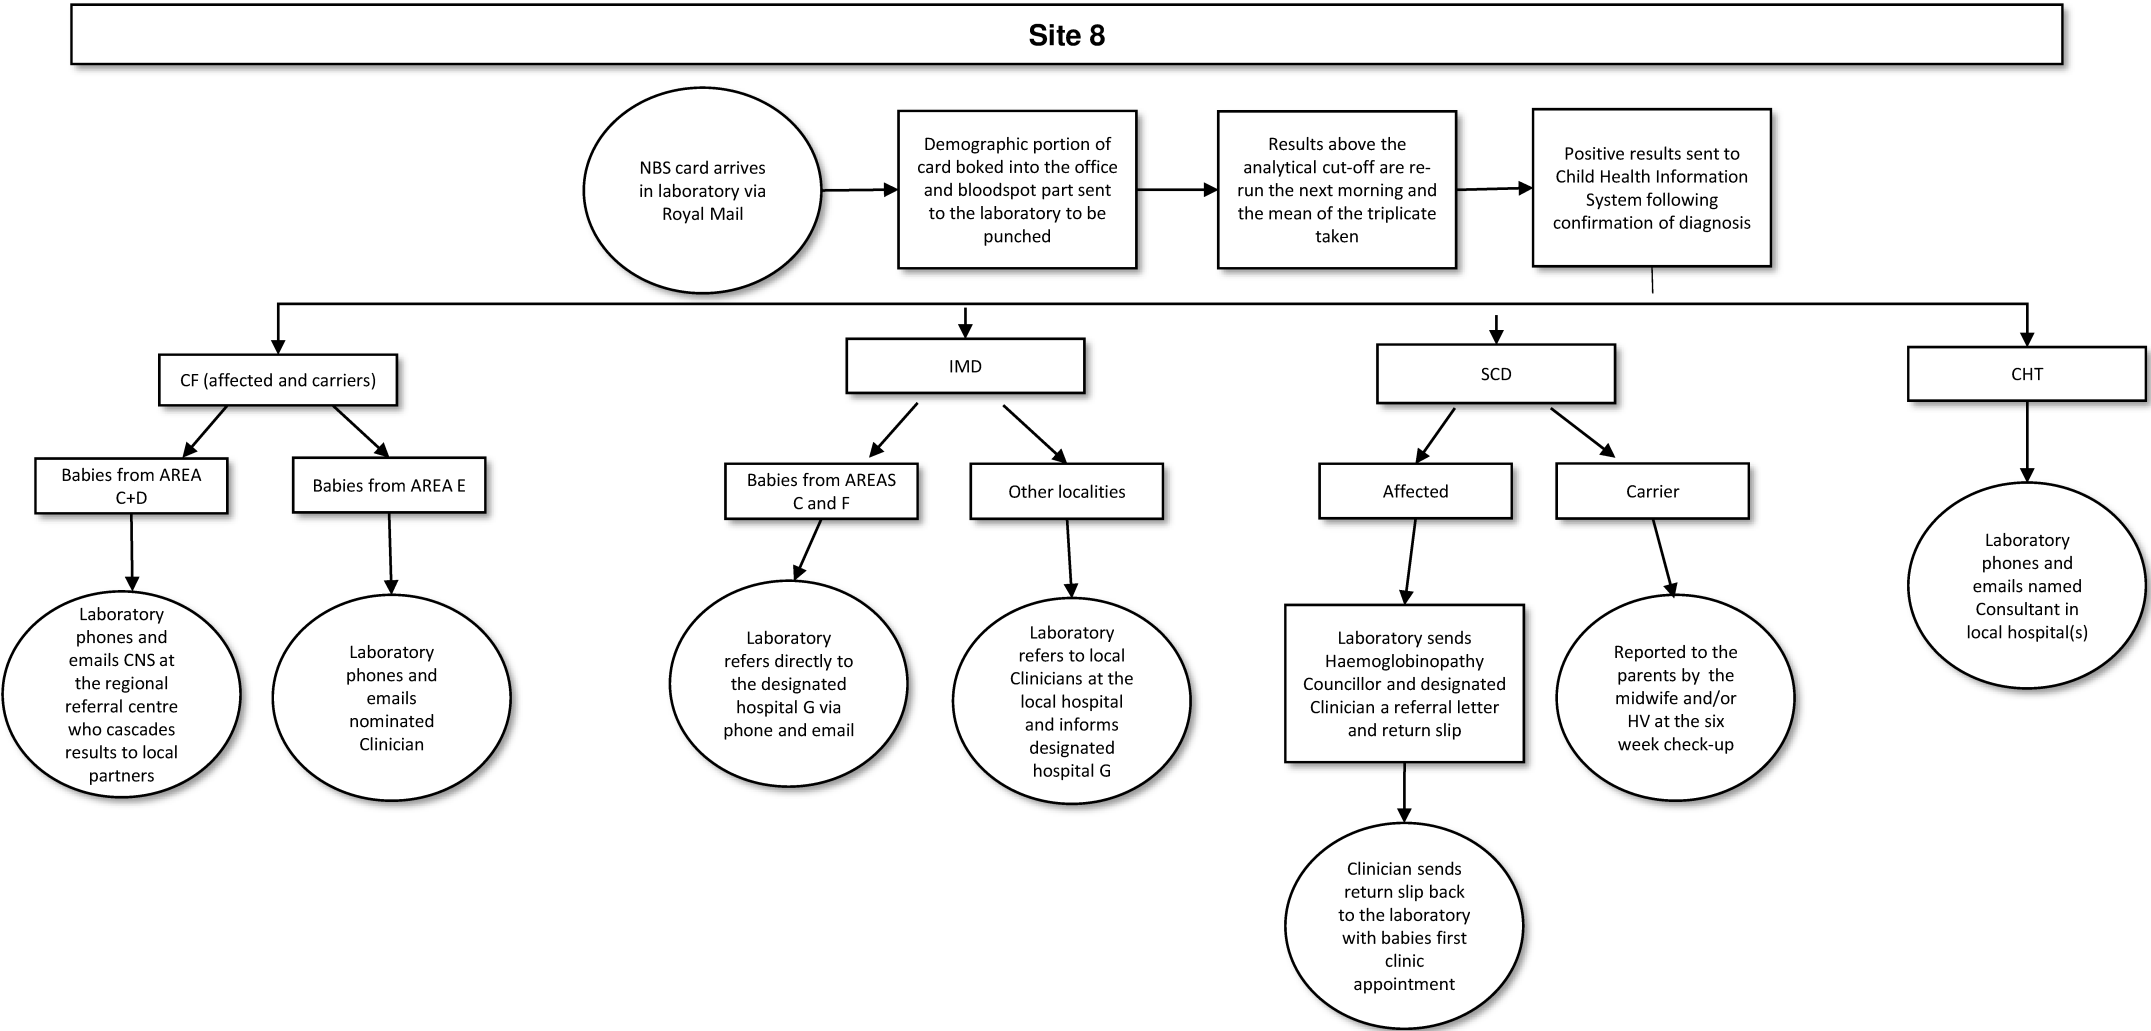



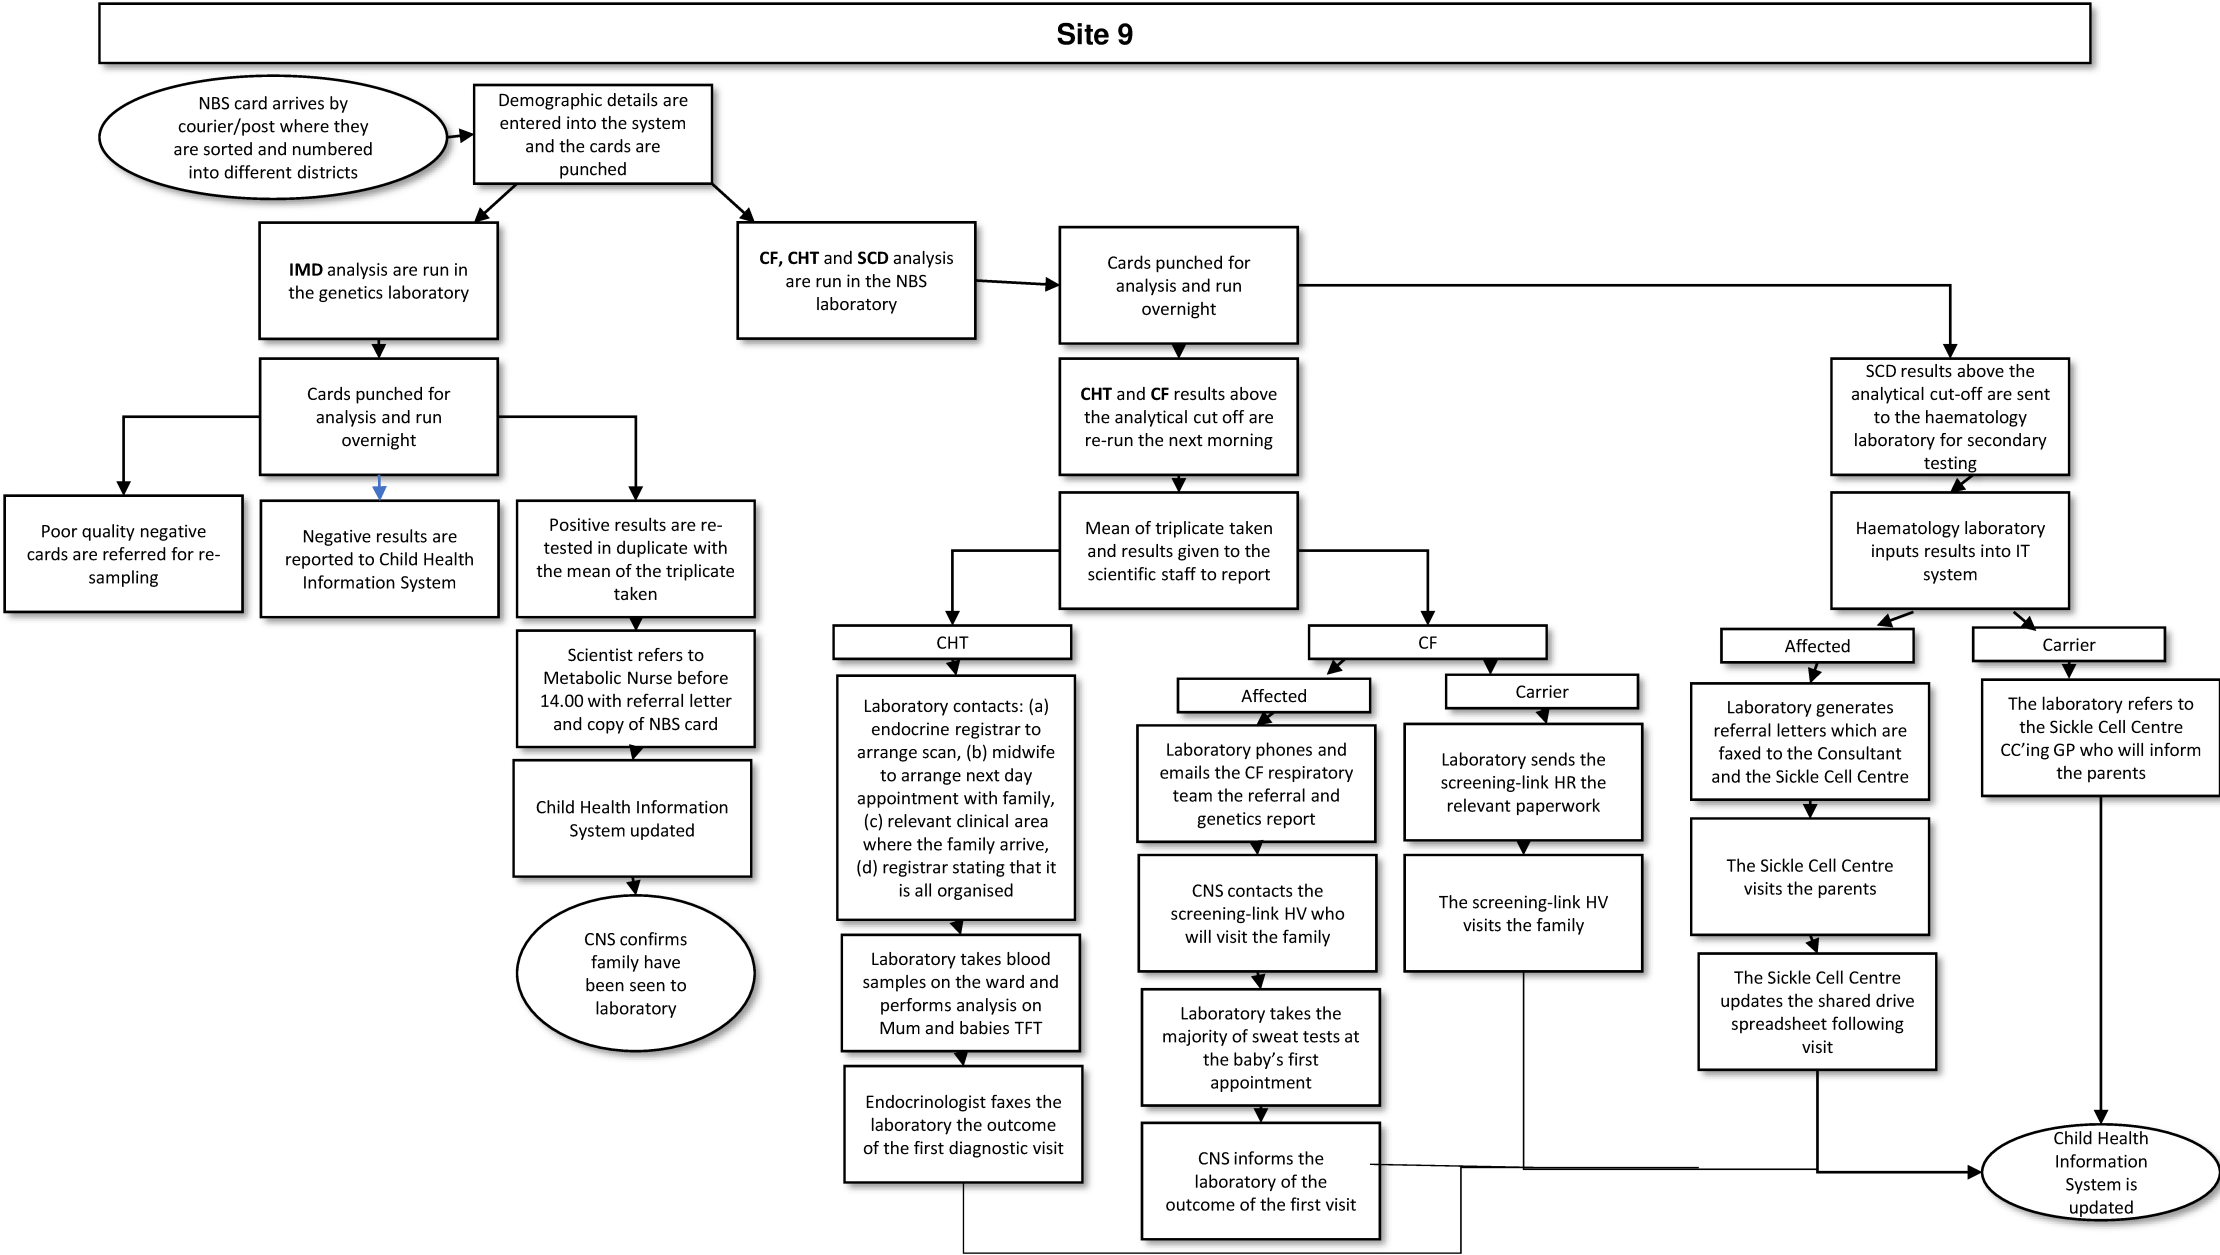

Site 10

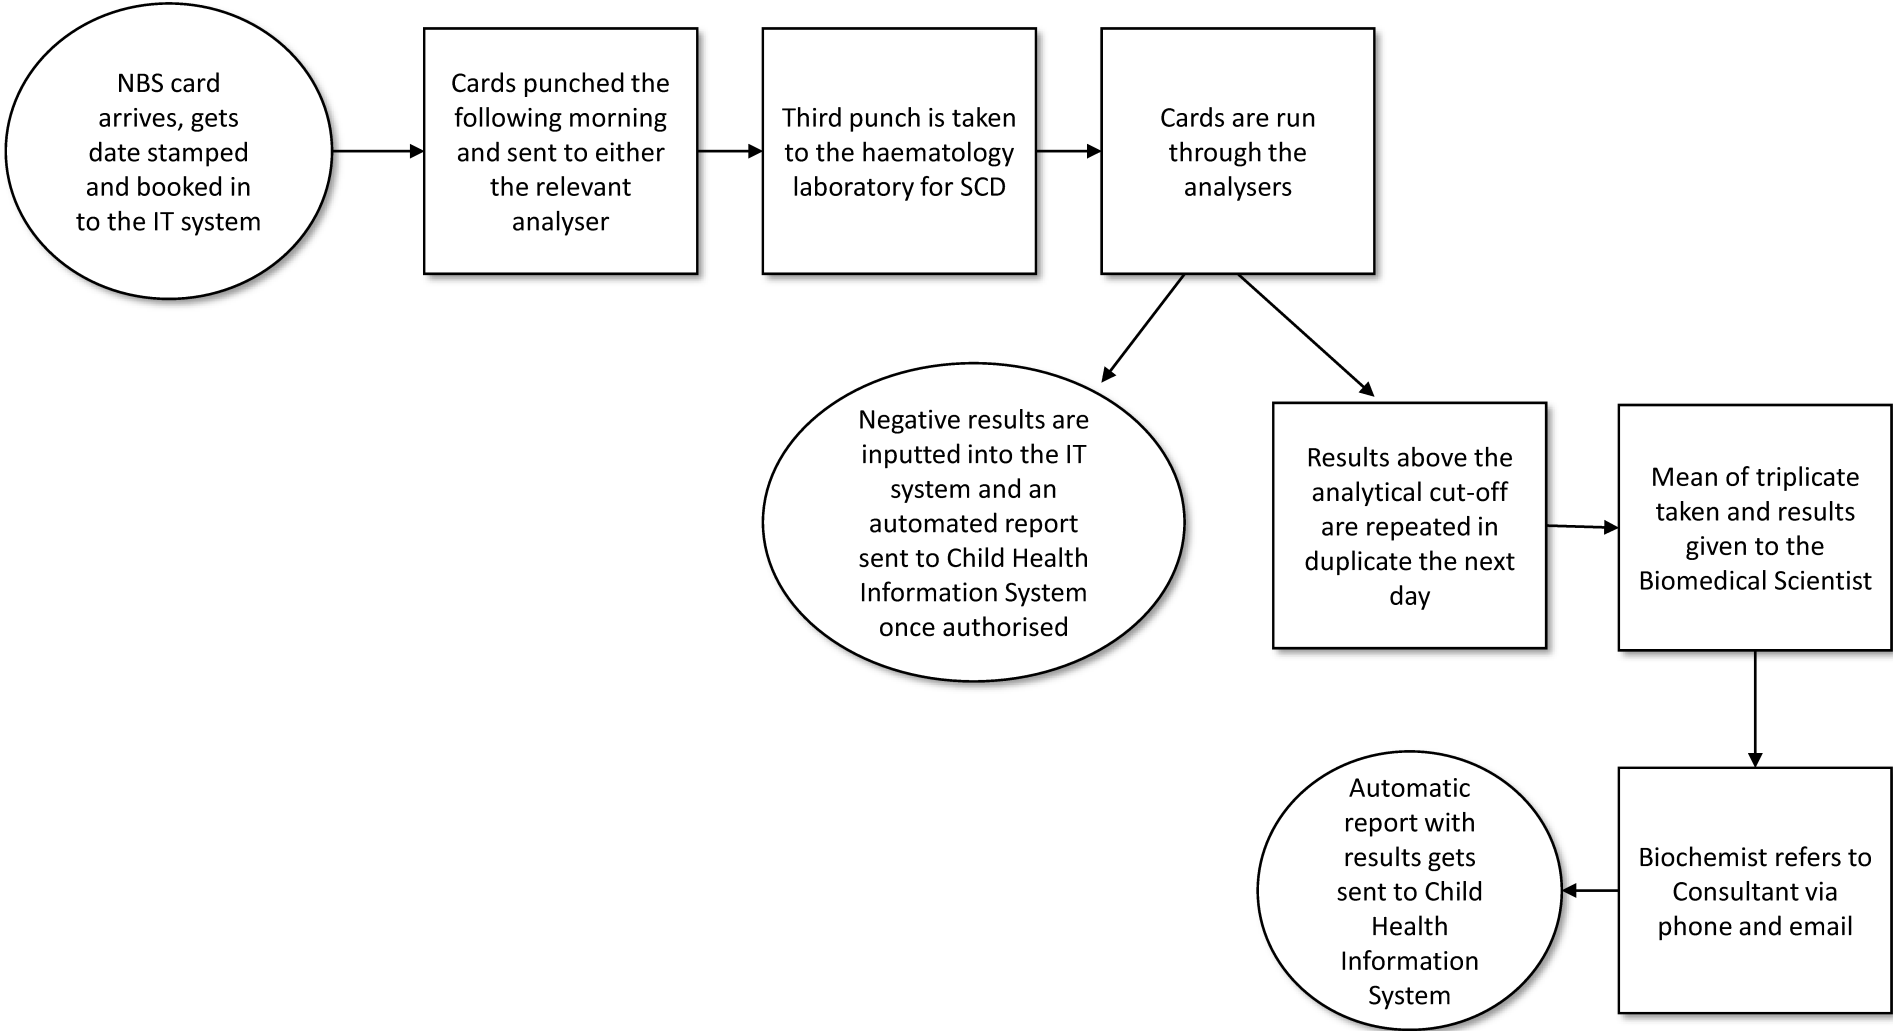

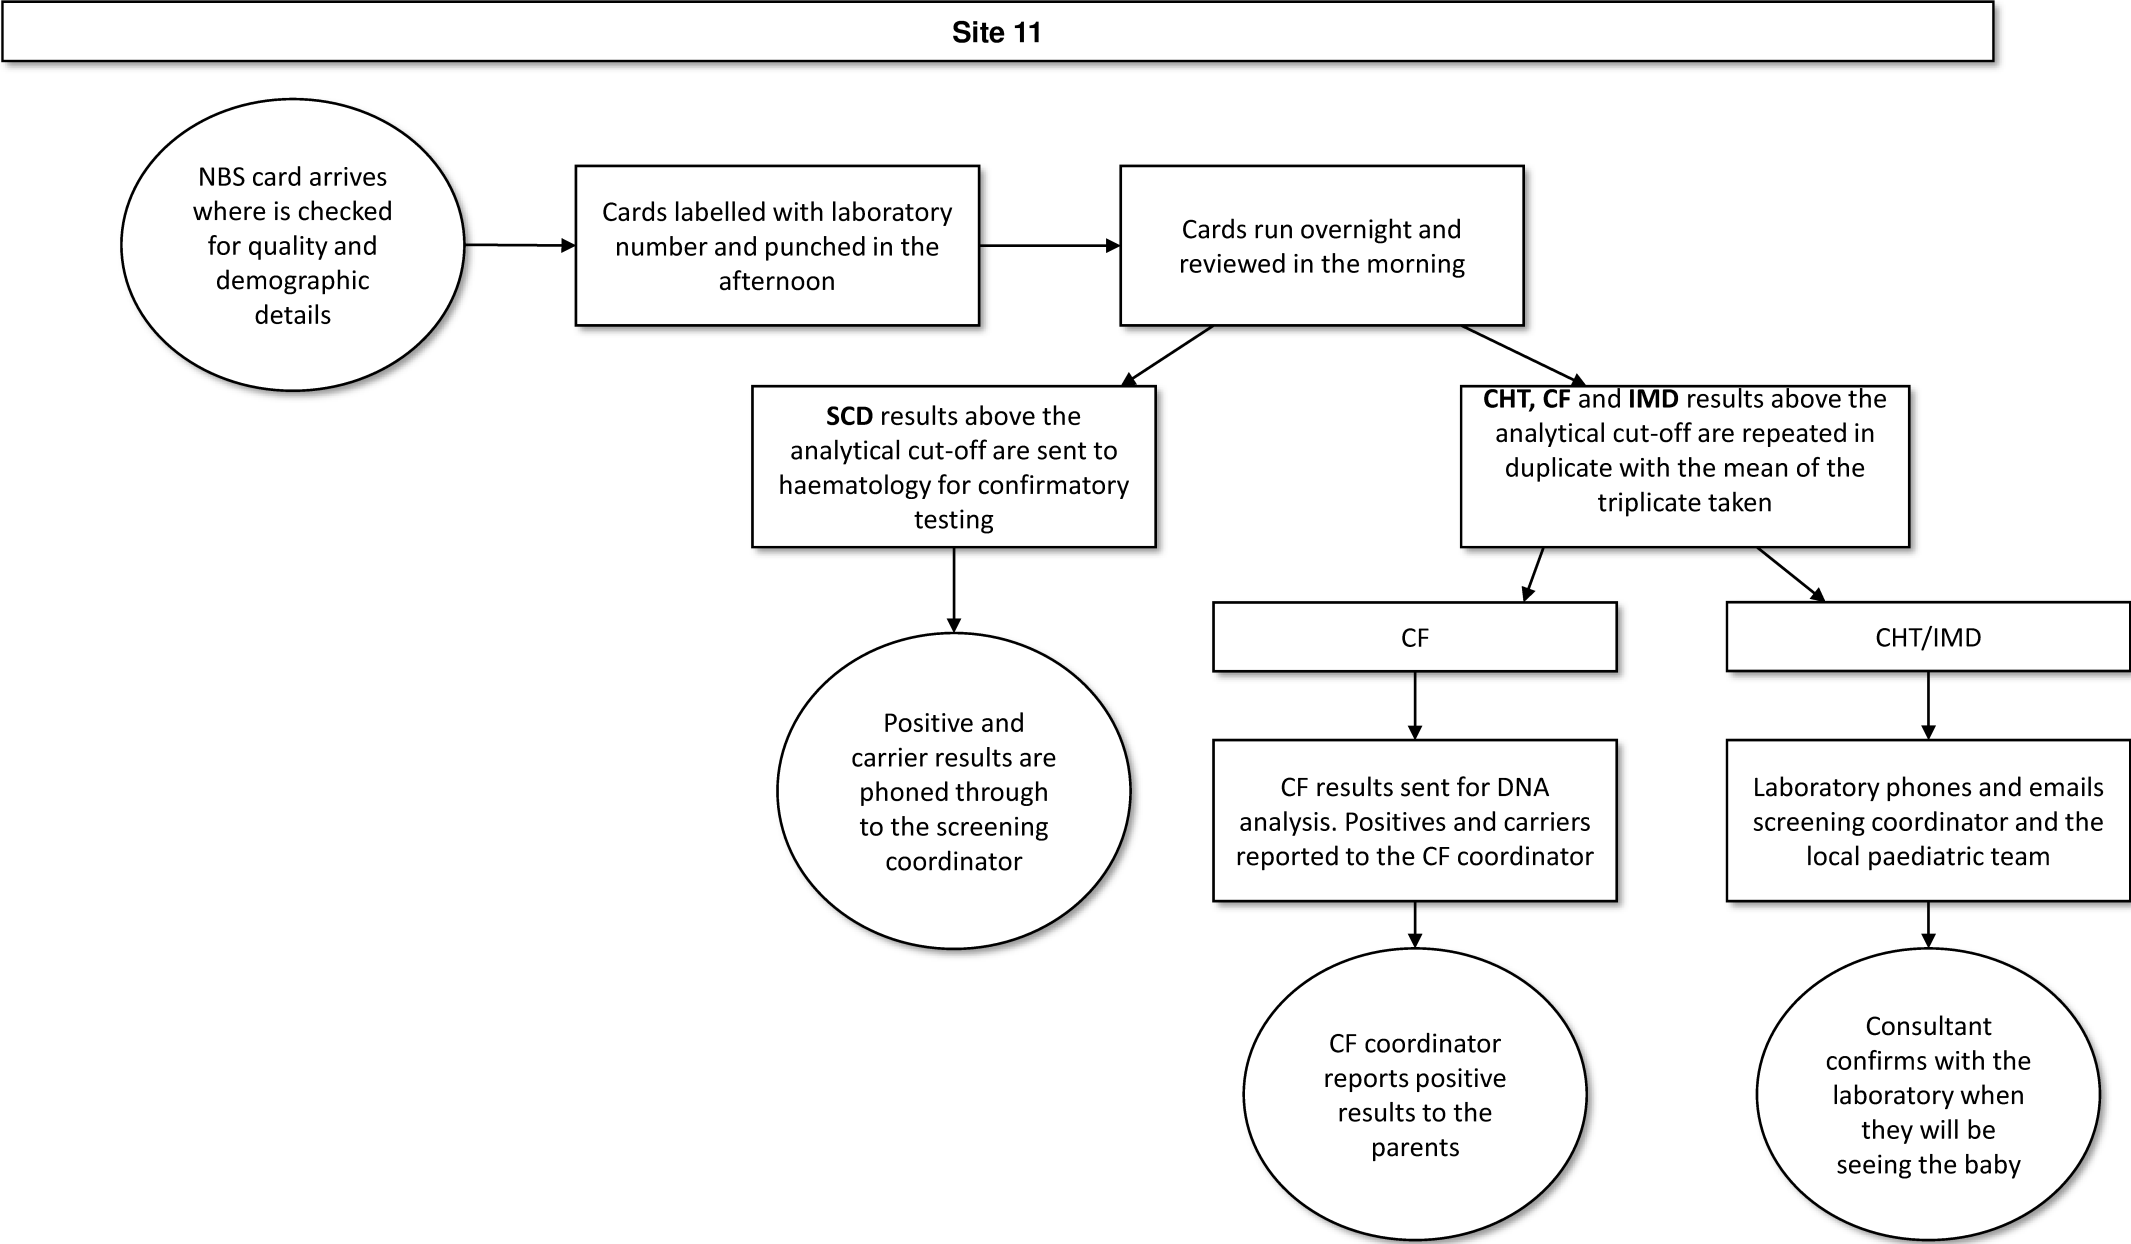

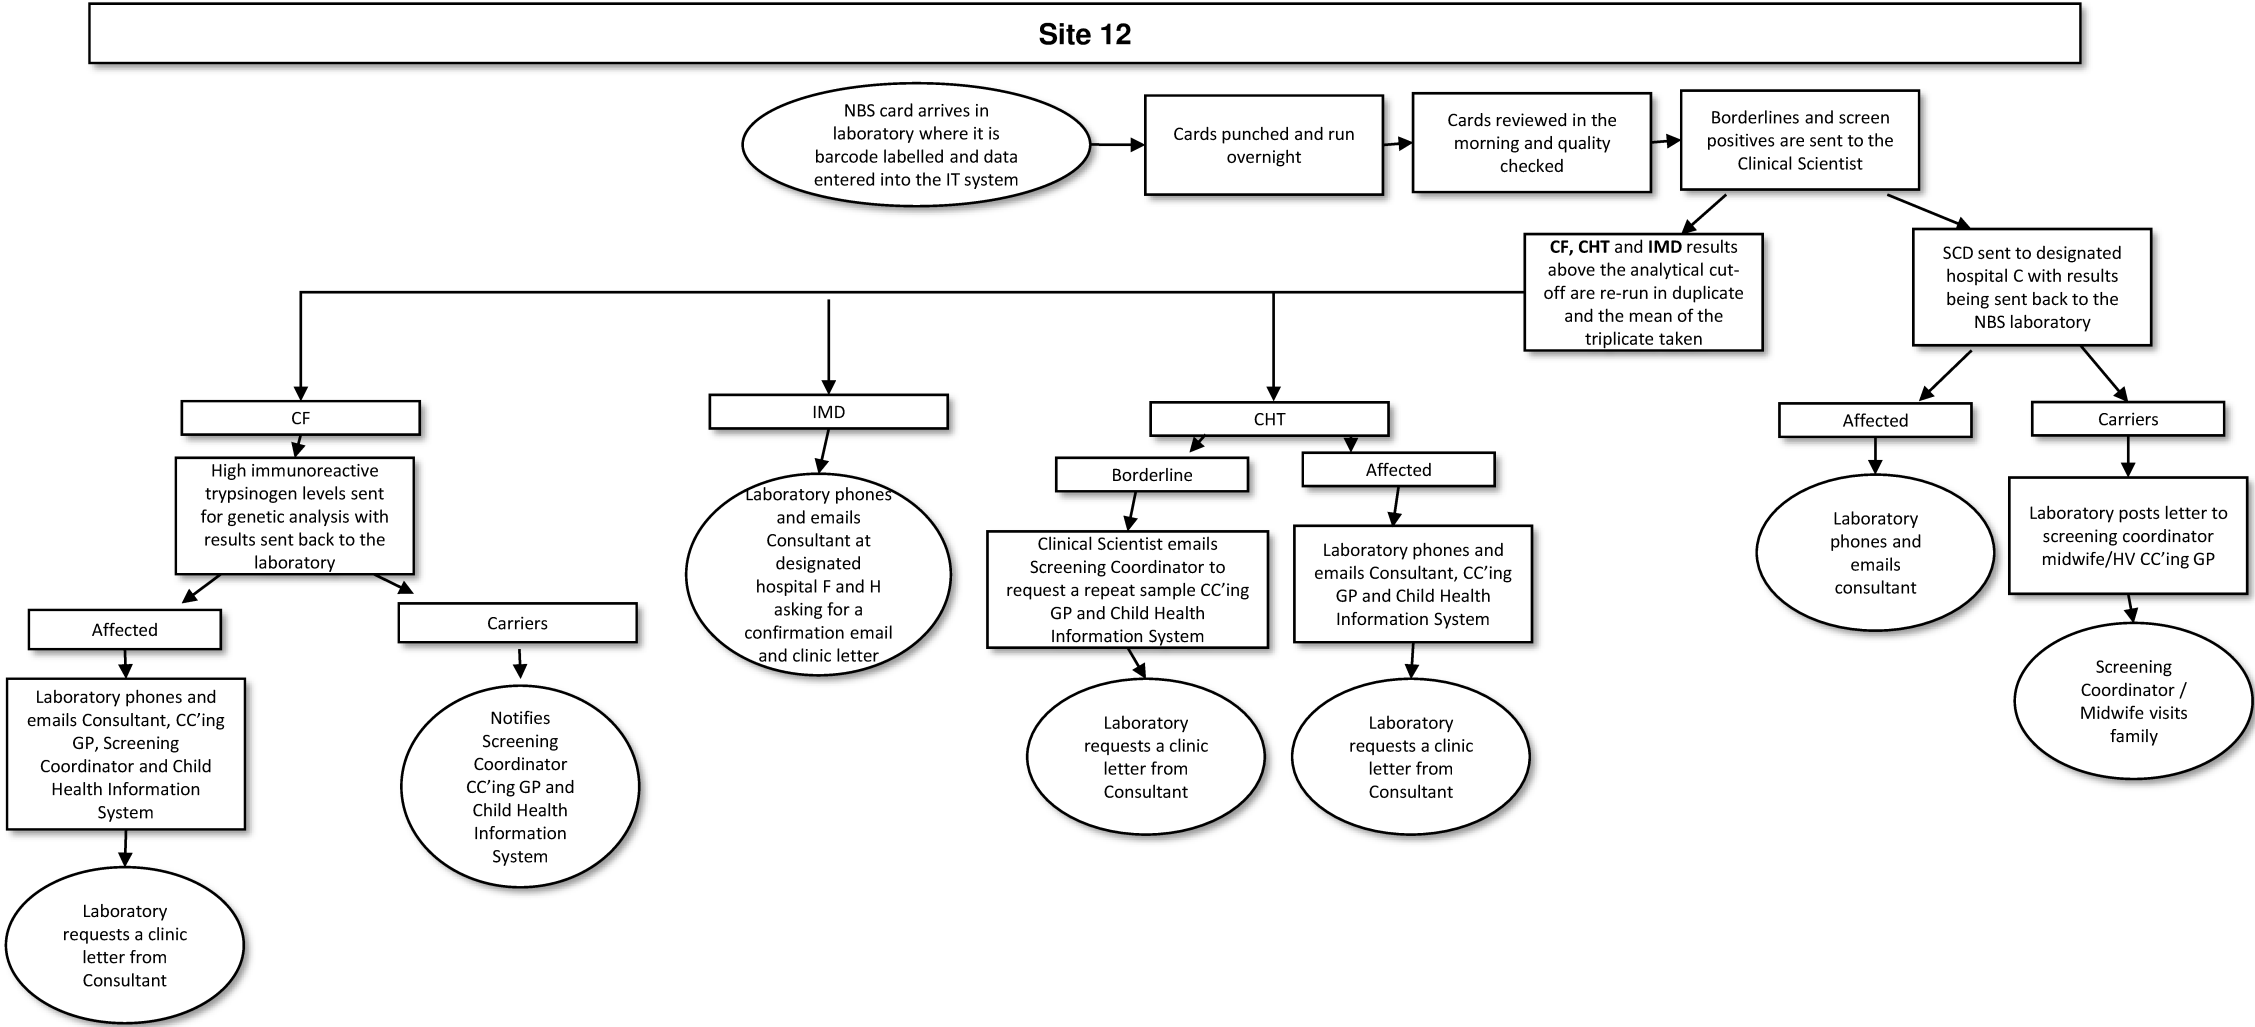

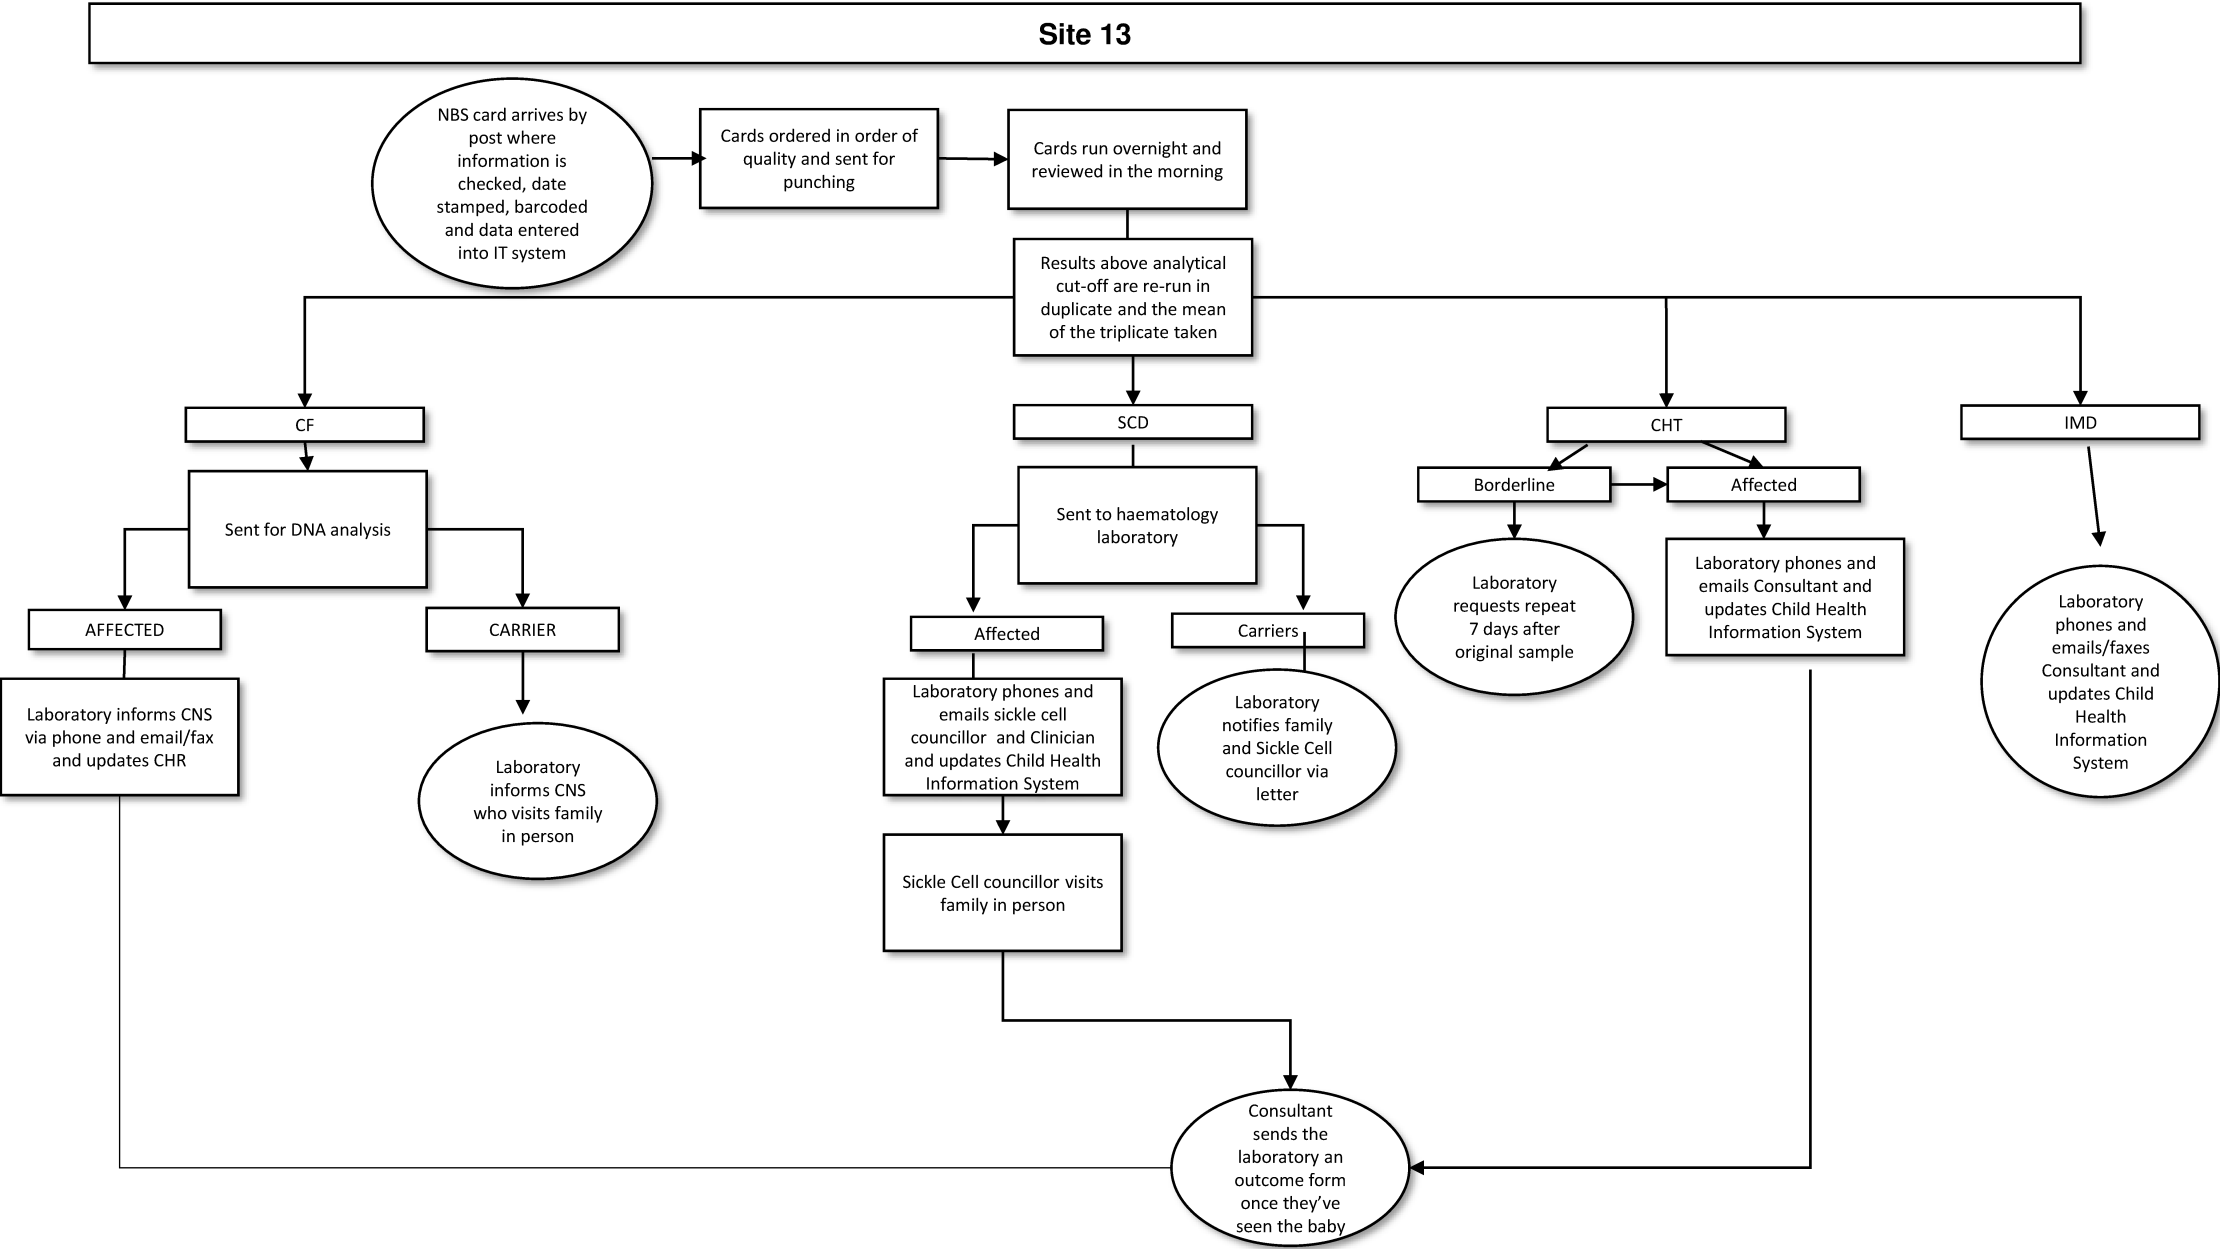

Supplement: inline-supplementary-material-2 [file inline-supplementary-material-2.pdf]
